# Supplementary material
Source: ML conference proceedings conference paper supplement (https://proceedings.neurips.cc/paper_files/paper/2022/hash/2c19666cbb2c14d45d39e2dcf6ab0b99-Abstract.html)
Supplement: Supplementary file 1 [file 2c19666cbb2c14d45d39e2dcf6ab0b99-Supplemental-Conference.pdf]

## A Proof of results from Section 3

### A.1 Proof of Lemma 2

*Proof.* First we prove result in the case that  $\|d_k\| < \gamma_2 r_k$ . By (6b) the statement  $\|d_k\| < \gamma_2 r_k$  implies  $\delta_k = 0$ . Combining  $\delta_k = 0$  with (6a) and (9) and using the fact  $1 - \gamma_1 > 0$  yields

$$\|\nabla f(x_k + d_k)\| \leq \frac{L}{2(1 - \gamma_1)} \|d_k\|^2 \leq c_1 L \|d_k\|^2.$$

Next we prove the result in the case that  $\hat{\rho}_k \leq \beta$ . Then

$$\begin{aligned} M_k(d_k) + \frac{L}{6} \|d_k\|^3 &\geq f(x_k + d_k) - f(x_k) = -\hat{\rho}_k \left( -M_k(d_k) + \frac{\theta}{2} \|\nabla f(x_k + d_k)\| \|d_k\| \right) \\ &\geq -\beta \left( -M_k(d_k) + \frac{\theta}{2} \|\nabla f(x_k + d_k)\| \|d_k\| \right) \end{aligned}$$

where the first inequality uses (10), the first equality uses the definition of  $\hat{\rho}_k$ , and the second inequality uses  $\hat{\rho}_k \leq \beta$  and  $-M_k(d_k) + \frac{\theta}{2} \|\nabla f(x_k + d_k)\| \|d_k\| \geq 0$ .

Rearranging the previous inequality using  $1 - \beta > 0$  and then applying (6d) yields:

$$\frac{L}{3(1 - \beta)} \|d_k\|^2 + \frac{\beta\theta}{1 - \beta} \|\nabla f(x_k + d_k)\| \geq -\frac{2M_k(d_k)}{\|d_k\|} \geq \gamma_3 \delta_k \|d_k\|. \quad (13)$$

Now, by (9), (6a) and the triangle inequality, and (13) respectively:

$$\begin{aligned} \|\nabla f(x_k + d_k)\| &\leq \|\nabla M_k(d_k)\| + \frac{L}{2} \|d_k\|^2 \leq \delta_k \|d_k\| + \gamma_1 \|\nabla f(x_k + d_k)\| + \frac{L}{2} \|d_k\|^2 \\ &\leq L \left( \frac{1}{3\gamma_3(1 - \beta)} + \frac{1}{2} \right) \|d_k\|^2 + \left( \frac{\beta\theta}{\gamma_3(1 - \beta)} + \gamma_1 \right) \|\nabla f(x_k + d_k)\|. \end{aligned}$$

Rearranging the latter inequality for  $\|\nabla f(x_k + d_k)\|$  and using  $\frac{\beta\theta}{\gamma_3(1 - \beta)} + \gamma_1 < 1$  from the requirements of Algorithm 1 yields:

$$\begin{aligned} \|\nabla f(x_k + d_k)\| &\leq \frac{\frac{1}{3\gamma_3(1 - \beta)} + \frac{1}{2}}{1 - \frac{\beta\theta}{\gamma_3(1 - \beta)} - \gamma_1} L \|d_k\|^2 = \frac{2 + 3\gamma_3(1 - \beta)}{6(\gamma_3(1 - \gamma_1)(1 - \beta) - \beta\theta)} L \|d_k\|^2 \\ &\leq \frac{5 - 3\beta}{6(\gamma_3(1 - \gamma_1)(1 - \beta) - \beta\theta)} L \|d_k\|^2. \end{aligned}$$

□

### A.2 Proof of Lemma 5

*Proof.* For conciseness let  $m = |\mathcal{P}_\epsilon|$ . Suppose that the indices of  $\mathcal{P}_\epsilon$  are ordered increasing value by a permutation function  $\pi$ , i.e.,  $\mathcal{P}_\epsilon = \{\pi(i) : i \in [m]\}$  with  $\pi(1) < \dots < \pi(m)$ . Then

$$\Delta_f \geq f(x_{\pi(1)}) - f(x_{\pi(m)}) = \sum_{i=1}^{m-1} f(x_{\pi(i)}) - f(x_{\pi(i+1)})$$

where the first inequality uses the fact that  $f(x_{\pi(i)})$  is non-increasing in  $\pi(i)$  and  $f(x_{\pi(i)}) \geq f_\star$  and the equality is simply the definition of the telescoping sum of  $f(x_{\pi(m)}) - f(x_{\pi(1)})$ . Therefore,

$$\begin{aligned} \Delta_f &\geq \sum_{i=1}^{m-1} f(x_{\pi(i)}) - f(x_{\pi(i+1)}) = \sum_{i=1}^{m-1} \hat{\rho}_{\pi(i)} \left( -M_k(d_{\pi(i)}) + \frac{\theta}{2} \|\nabla f(x_{\pi(i)} + d_{\pi(i)})\| \|d_{\pi(i)}\| \right) \\ &\geq \sum_{i=1}^{m-1} \beta \left( -M_k(d_{\pi(i)}) + \frac{\theta}{2} \|\nabla f(x_{\pi(i)} + d_{\pi(i)})\| \|d_{\pi(i)}\| \right) \geq \frac{\beta\theta}{2} \sum_{i=1}^{m-1} \|\nabla f(x_{\pi(i)} + d_{\pi(i)})\| \|d_{\pi(i)}\| \\ &\geq \frac{\epsilon\beta\theta}{2} (m - 1) d_\epsilon \end{aligned}$$

where the first equality uses the definition of  $\hat{\rho}_{\pi(i)}$ , the second inequality follows from  $\hat{\rho}_{\pi(i)} \geq \beta$  for  $\pi(i) \in \mathcal{P}_\epsilon$ , the third inequality uses that  $-M_k(d_{\pi(i)}) \geq 0$ , the final inequality uses that  $\pi(i) \in \mathcal{P}_\epsilon$  implies that  $\|\nabla f(x_{\pi(i)} + d_{\pi(i)})\| \geq \epsilon$  (by definition of  $\pi(i) \in \mathcal{P}_\epsilon$ ) and  $\underline{d}_\epsilon \leq \|d_{\pi(i)}\|$  (due to Lemma 4).

Rearranging the latter inequality for  $m$  using the fact that  $\beta\theta\epsilon\underline{d}_\epsilon > 0$  and  $\Delta_f \geq 0$  yields  $m \leq \frac{2\Delta_f}{\beta\theta\epsilon\underline{d}_\epsilon} + 1 = \frac{\bar{d}_\epsilon}{\underline{d}_\epsilon\omega} + 1 =$  where the equalities use the definitions of  $\bar{d}_\epsilon$  and  $\underline{d}_\epsilon$ .  $\square$

### A.3 Proof of Theorem 1

*Proof.* Define:

$$\begin{aligned} n_j &:= |\{k \in \mathbf{N} : k \notin \mathcal{P}_\epsilon, k < K_\epsilon, k_\epsilon < k \leq j\}| \\ p_j &:= |\{k \in \mathcal{P}_\epsilon : k_\epsilon < k \leq j\}|. \end{aligned}$$

First we establish that

$$n_\infty \leq p_\infty + \log_\omega \left( \max \left\{ \frac{\bar{d}_\epsilon}{\underline{d}_\epsilon}, 1 \right\} \right). \quad (14)$$

Consider the induction hypothesis that

$$r_k \leq r_{k_\epsilon} \omega^{p_k - n_k} \quad \forall k \in [k_\epsilon, K_\epsilon) \cap \mathbf{N}. \quad (15)$$

If  $k = k_\epsilon$  then  $p_k = n_k = 0$  and the hypothesis holds. Suppose that the induction hypothesis holds for  $k = j$ . Note that for all  $j \in \mathbf{N}$  either  $p_{j+1} = p_j + 1$  (and  $n_{j+1} = n_j$ ) or  $n_{j+1} = n_j + 1$  (and  $p_{j+1} = p_j$ ). If  $p_{j+1} = p_j + 1$  then

$$r_{j+1} = \|d_j\|\omega \leq r_j\omega \leq r_{k_\epsilon} \omega^{p_j - n_j + 1} = r_{k_\epsilon} \omega^{p_{j+1} - n_{j+1}}.$$

On the other hand, if  $n_{j+1} = n_j + 1$  then

$$r_{j+1} = \|d_j\|/\omega \leq r_j/\omega \leq r_{k_\epsilon} \omega^{p_j - n_j - 1} = r_{k_\epsilon} \omega^{p_{j+1} - n_{j+1}}.$$

Therefore by induction (15) holds. By (15) and Lemma 4,

$$\underline{d}_\epsilon \leq \bar{d}_\epsilon \omega^{p_k - n_k}$$

which establishes (14).

By Lemma 4 we have  $k_\epsilon \leq 1 + \log_{\gamma_2\omega}(\max\{1, \underline{d}_\epsilon/r_1, r_1/\bar{d}_\epsilon\})$  and Lemma 5 we have  $p_\infty \leq \frac{\bar{d}_\epsilon}{\underline{d}_\epsilon\omega} + 1$ ; using these inequalities in conjunction with (14) gives

$$\begin{aligned} K_\epsilon &= k_\epsilon + p_\infty + n_\infty + 1 \leq k_\epsilon + 2p_\infty + \log_\omega(\max\{\bar{d}_\epsilon/\underline{d}_\epsilon\}) + 1 \\ &\leq \log_{\omega\gamma_2}(\max\{1, \underline{d}_\epsilon/r_1, r_1/\bar{d}_\epsilon\}) + \frac{2\bar{d}_\epsilon}{\underline{d}_\epsilon\omega} + \log_\omega(\max\{1, \bar{d}_\epsilon/\underline{d}_\epsilon\}) + 3 \\ &\leq \frac{2\bar{d}_\epsilon}{\underline{d}_\epsilon\omega} + 2 \log_{\omega\gamma_2} \left( \max \left\{ \frac{\bar{d}_\epsilon}{\underline{d}_\epsilon}, \frac{\underline{d}_\epsilon}{r_1}, \frac{r_1}{\bar{d}_\epsilon}, 1 \right\} \right) + 3 \\ &= c_2 \cdot \frac{\Delta_f L^{1/2}}{\epsilon^{-3/2}} + 2 \log_{\omega\gamma_2} \left( \max \left\{ \frac{c_2\omega}{2} \cdot \frac{\Delta_f L^{1/2}}{\epsilon^{3/2}}, \frac{\gamma_2}{\omega c_1^{1/2}} \cdot \frac{\epsilon^{1/2}}{L^{1/2}r_1}, \frac{\beta\theta}{2\omega} \cdot \frac{r_1 L^{1/2}}{\epsilon^{1/2}}, 1 \right\} \right) + 3 \end{aligned}$$

where

$$c_2 := \frac{4c_1^{1/2}\omega}{\beta\theta\gamma_2}$$

is a problem-independent constant. As  $c_1, c_2, \omega, \beta, \theta, \gamma_1, \gamma_2$  and  $\gamma_3$  are problem-independent constants (see the definition of  $c_1$  in Lemma 2 and the requirements of Algorithm 1) the result follows.  $\square$

## B Proof of Theorem 2

We first prove Theorem 3 and then reduce Theorem 2 to Theorem 3. The following fact will be useful.

**Fact 3** ([53]). *If  $f$  is  $\alpha$ -strongly convex and  $S$ -smooth on the set  $C$  (i.e.,  $\alpha\mathbf{I} \preceq \nabla^2 f(x) \preceq S\mathbf{I}$  for all  $x \in C$ ) then*

$$\alpha\|x - x_\star\| \leq \|\nabla f(x)\| \leq S\|x - x_\star\| \quad (16)$$

where  $x_\star$  is any minimizer of  $f$ .

**Theorem 3.** *Suppose that  $f$  is  $L$ -Lipschitz,  $\nabla f(x_\star) = 0$  and there exists  $\alpha, S, t > 0$  such that  $\alpha\mathbf{I} \preceq \nabla^2 f(x) \preceq S\mathbf{I}$  for all  $x \in \{x \in \mathbf{R}^n : \|x - x_\star\| \leq t\}$ . Consider the set*

$$C := \left\{ x \in \mathbf{R}^n : f(x) \leq f(x_\star) + \frac{2\eta^2}{\alpha}, \|x - x_\star\| \leq \eta \right\}$$

with

$$\eta = \min \left\{ t, \frac{\alpha^3(1-\gamma_1)}{2LS^2} \min \left\{ \frac{1}{2}, \omega\gamma_2 - 1 \right\}, \frac{12(1-\beta)\alpha}{L\omega\gamma_2}, \frac{\beta\theta(1-\beta)\alpha}{4\omega\gamma_2 Lc_1} \right\}$$

then if  $x_i \in C$  then for  $k \geq 2 + i + \log_{\gamma_2\omega}(\frac{\eta}{\|d_i\|})$  we have

$$\|x_{k+1} - x_\star\| \leq \frac{2LS^2}{\alpha^3(1-\gamma_1)} \|x_k - x_\star\|^2.$$

*Proof.* We begin by establishing the premise of Lemma 6. First we establish  $x_k \in C \implies x_{k+1} \in C$ . Suppose that  $x_k \in C$  then  $f(x_{k+1}) \leq f(x_k) \leq f(x_\star) + \frac{2\eta^2}{\alpha}$ . By strong convexity we get  $x_{k+1} \in C$ . Next we establish that  $\min\{\gamma_2 r_k, \|x_{k+1} - x_\star\|\} \leq \|d_k\| \leq \omega\gamma_2 \|x_k - x_\star\|$ . By strong convexity and (6d) we have

$$\frac{\alpha + \delta_k}{2} \|d_k\|^2 - \|\nabla f(x_k)\| \|d_k^N\| \leq M_k(d_k^N) \leq 0$$

which implies  $\|d_k\| \leq \frac{2\|\nabla f(x_k)\|}{\alpha + \delta_k}$ . Furthermore, by (9), (6a) and  $\|d_k\| \leq \frac{2\|\nabla f(x_k)\|}{\alpha + \delta_k}$  we have

$$\|\nabla f(x_k + d_k) + \delta_k d_k\| \leq \|\nabla M_k(d_k) + \delta_k d_k\| + \frac{L}{2} \|d_k\|^2 \leq \gamma_1 \|\nabla f(x_k + d_k)\| + \frac{2L\|\nabla f(x_k)\|^2}{\alpha^2}$$

which after rearranging

$$\|\nabla f(x_k + d_k) + \delta_k d_k\| \leq \frac{2L}{\alpha^2(1-\gamma_1)} \|\nabla f(x_k)\|^2 \quad (17)$$

By strong convexity and smoothness,

$$\|x_k + d_k - \hat{x}_k\| \leq \frac{2LS^2}{\alpha^3(1-\gamma_1)} \|x_k - x_\star\|^2 \quad (18)$$

where  $\hat{x}_k := \min f(x) + \frac{\delta_k}{2} \|x - x_k\|^2$ . Therefore, as  $\|x_k - x_\star\| \leq \frac{\alpha^3(1-\gamma_1)}{2LS^2} \min \left\{ \frac{1}{2}, \omega\gamma_2 - 1 \right\}$ ,

$$\|x_k + d_k - \hat{x}_k\| \leq \min \left\{ \frac{1}{2}, \omega\gamma_2 - 1 \right\} \|x_k - x_\star\|$$

which combined with the triangle inequality and  $\|\hat{x}_k - x_k\| \leq \|x_k - x_\star\|$  gives

$$\|d_k\| \leq \|x_k + d_k - \hat{x}_k\| + \|x_k - \hat{x}_k\| \leq \omega\gamma_2 \|x_k - x_\star\|$$

Furthermore, if  $\|d_k\| < \gamma_2 r_k$  then by (6b) we have  $\delta_k = 0$  and  $\hat{x}_k = x_\star$  which gives

$$\|x_k + d_k - x_\star\| \leq \frac{1}{2} \|x_k - x_\star\| \leq \|x_k - x_\star\| - \|x_k + d_k - x_\star\| \leq \|d_k\|.$$

Next we show  $x_k \in C$  implies  $\hat{\rho}_k \geq \beta$ . To obtain a contradiction we assume  $\hat{\rho}_k < \beta$ , by the definition of the model, (6a) and strong convexity we get

$$\begin{aligned} M_k(d_k) &= \frac{1}{2} d_k^T \nabla^2 f(x_k) d_k + \nabla f(x_k)^T d_k = d_k^T (\nabla^2 f(x_k) d_k + \delta_k d_k + \nabla f(x_k)) - \frac{1}{2} d_k^T (\nabla^2 f(x_k) + 2\delta_k \mathbf{I}) d_k \\ &\leq \gamma_1 \|d_k\| \|\nabla f(x_{k+1})\| - \frac{1}{2} d_k^T (\nabla^2 f(x_k) + 2\delta_k \mathbf{I}) d_k \\ &\leq \gamma_1 \|d_k\| \|\nabla f(x_{k+1})\| - \frac{\alpha}{2} \|d_k\|^2. \end{aligned}$$

It follows that by inequality (10),  $\|d_k\| \leq \omega\gamma_2\|x_k - x_\star\| \leq \frac{12}{L}(1 - \beta)\alpha$ , inequality (11),  $\|d_k\| \leq \omega\gamma_2\|x_k - x_\star\| \leq \frac{\beta\theta(1-\beta)\alpha}{4Lc_1}$  we have

$$\begin{aligned} f(x_k) - f(x_{k+1}) &\geq -\beta M_k(d_k) + \frac{(1 - \beta)\alpha}{2}\|d_k\|^2 - \frac{L}{6}\|d_k\|^3 \\ &\geq -\beta M_k(d_k) + \frac{(1 - \beta)\alpha}{4}\|d_k\|^2 \\ &\geq -\beta M_k(d) + \frac{(1 - \beta)\alpha}{4Lc_1}\|\nabla f(x_k)\| \\ &\geq -\beta M_k(d) + \beta\theta\|\nabla f(x_k)\|\|d_k\| \end{aligned}$$

which gives our desired contradiction.

With the premise of Lemma 6 established we conclude that for  $k \geq 2 + i + \log(\eta/\|d_i\|)$  we have  $\delta_k = 0$  and therefore by (18) we get the desired result.  $\square$

The following Lemma is a standard result but we include it for completeness.

**Lemma 7.** *If  $\nabla^2 f(x_\star)$  is twice differentiable and positive definite, then there exists a neighborhood  $N$  and positive constants  $\alpha, \beta > 0$  such that  $\alpha\mathbf{I} \preceq \nabla^2 f(x) \preceq S\mathbf{I}$  for all  $x \in N$ .*

*Proof.* As  $\nabla^2 f$  is twice differentiable and the fact that continuous functions on compact sets are bounded we conclude that there exists a neighborhood  $N$  around  $x_\star$  that  $\nabla^2 f$  is  $L$ -Lipschitz for some constant  $L \in (0, \infty)$ . Then by using the fact that there exists positive constants  $\alpha', \beta' \in (0, \infty)$  s.t.  $\alpha'\mathbf{I} \preceq \nabla^2 f(x_\star) \preceq \beta'\mathbf{I}$  we conclude for sufficiently small ball around  $x_\star$  we have  $\alpha'/2\mathbf{I} \preceq \nabla^2 f(x) \preceq 2\beta'\mathbf{I}$  for all  $x$  in a sufficiently small neighborhood  $N' \subseteq N$ .  $\square$

*Proof of Theorem 2.* Follows by Lemma 7 and Theorem 3.  $\square$

## C Solving trust-region subproblem

In this section, we detail our approach to solve the trust-region subproblem. We first attempt to take a Newton's step by checking if  $\nabla^2 f(x_k) \succeq 0$  and  $\|\nabla^2 f(x_k)^{-1}\nabla f(x_k)\| \leq r_k$ . However, if that is not the case, then the optimally conditions mentioned in (6), will be a key ingredient in our approach to find  $\delta$  and hence  $d_k(\delta)$ . Based on these optimally conditions, we will define a univariate function  $\phi$  that we seek to find its root at each iteration. In our implementation we use  $\gamma_3 = 1.0$  for (6d) which is the same as satisfying (5d). The function  $\phi$  is defined as bellow:

$$\phi(\delta) := \begin{cases} -1, & \text{if } \nabla^2 f(x_k) + \delta\mathbf{I} \not\succeq 0 \text{ or } \|d_k(\delta)\| > r_k \\ +1, & \text{if } \nabla^2 f(x_k) + \delta\mathbf{I} \succeq 0 \ \& \ \|d_k(\delta)\| < \gamma_2 r_k \\ 0, & \text{if } \nabla^2 f(x_k) + \delta\mathbf{I} \succeq 0 \ \& \ \|d_k(\delta)\| \leq r_k \end{cases}$$

where:

$$d_k(\delta) := (\nabla^2 f(x_k) + \delta\mathbf{I})^{-1}(-\nabla f(x_k))$$

When we fail to take a Newton's step, we first find an interval  $[\delta, \delta']$  such that  $\phi(\delta) \times \phi(\delta') \leq 0$ . Then we apply bisection method to find  $\delta_k$  such that  $\phi(\delta_k) = 0$ . In case our root finding logic failed, then we use the approach from the hard case section under chapter 4 "Trust-Region Methods" in [44] to find the direction  $d_k$ .

The logic to find the interval  $[\delta, \delta']$  is summarized as follow. We first compute  $\phi(\delta)$  using the  $\delta$  value from the previous iteration. Then we search for  $\delta'$  by starting with  $\delta' = 2\delta$ . We compute  $\phi(\delta')$  and in the case  $\phi(\delta') < 0$ , we update  $\delta'$  to become twice its current value, otherwise if  $\phi(\delta') > 0$ , we update  $\delta'$  to become half its current value. We keep repeating this logic until we get a  $\delta'$  such that  $\phi(\delta) \times \phi(\delta') \leq 0$  or until we reach the maximum iteration limit which is marked as a failure.

The whole approach is summarized in Algorithm 2:

---

**Algorithm 2:** trust-region subproblems solver

---

```
if  $\nabla^2 f(x_k) \succeq 0$  then  
   $d_k = -\nabla^2 f(x_k)^{-1} \nabla f(x_k)$   
  if  $\|d_k\| \leq r$  then  
    return  $d_k$ ;  
if hard case then  
  Find  $d_k$  using [44, pages 87-88] ;  
  return  $d_k$   
else  
  Find initial interval  $[\delta, \delta']$  using the  $\phi$  function such that  $\phi(\delta) \times \phi(\delta') \leq 0$  ;  
  Use bisection method to find  $\delta_k$  such that  $\phi(\delta_k) = 0$  ;  
  return  $d_k(\delta_k)$ 
```

---

## D Experimental results details

### D.1 Learning linear dynamical systems

The time-invariant linear dynamical system is defined by:

$$\begin{aligned} h_{t+1} &= Ah_t + Bu_t + \xi_t \\ x_t &= h_t + \vartheta_t \end{aligned}$$

where the vectors  $h_t$  and  $x_t$  represent the hidden and observed state of the system at time  $t$ . Here  $u_t, \vartheta_t \sim N(0, 1)^d$ ,  $\xi_t \sim N(0, \sigma)^d$  and  $A$  and  $B$  are linear transformations.

The goal is to recover the parameters of the system using maximum likelihood estimation and hence we formulate the problem as follow:

$$\min_{A, B, h} \sum_{t=1}^T \frac{\|h_{t+1} - Ah_t - Bu_t\|^2}{\sigma^2} + \|x_t - h_t\|^2$$

We synthetically generate examples with noise both in the observations and also the evolution of the system. The entries of the matrix  $B$  are generated using a Normal distribution  $N(0, 1)$ . For the matrix  $A$ , we first generate a diagonal matrix  $D$  with entries drawn from a uniform distribution  $U[0.9, 0.99]$  and then we construct a random orthogonal matrix  $Q$  by randomly sampling a matrix  $W \sim N(0, 1)^{d \times d}$  and then performing an QR factorization. Finally using the matrices  $Q$  and  $D$ , we define  $A$ :

$$A = Q^T D Q$$

We compare our method against the Newton trust-region method available through the Optim.jl package [51] licensed under <https://github.com/JuliaNLSolvers/Optim.jl/blob/master/LICENSE.md>. In the results/learning problem subdirectory in the git repository, we present the full results of running our experiments on 60 randomly generated instances with  $T = 50$ ,  $d = 4$ , and  $\sigma = 0.01$  where we used a value of  $10^{-5}$  for the gradient termination tolerance. This experiment was performed on a MacBook Air (M1, 2020) with 8GB RAM.

### D.2 Matrix completion

The original power consumption data is denoted by a matrix  $D \in R^{n_1 \times n_2}$  where  $n_1$  represents the number of measurements taken per day within a 15 mins interval and  $n_2$  represents the number of days. Part of the data is missing, hence the goal is to recover the original data. The set  $\Omega = \{(i, j) | D_{i,j} \text{ is observed}\}$  denotes the indices of the observed data in the matrix  $D$ .

We decompose  $D$  as a product of two matrices  $P \in R^{n_1 \times r}$  and  $Q \in R^{n_2 \times r}$  where  $r < n_1$  and  $r < n_2$ :

$$D = PQ^T.$$

To account for the effect of time and day on the power consumption data , we use a baseline estimate [54]:

$$d_{i,j} = \mu + r_i + c_j$$

where  $\mu$  denotes the mean for all observed measurements,  $r_i$  denotes the observed deviation during time  $i$ , and  $c_j$  denotes the observed deviation during day  $j$  [49, 54].

We formulate the matrix completion problem as the regularized squared error function of SVD model [49, Equation 10]:

$$\min_{r,c,p,q} \sum_{(i,j) \in \Omega} (D_{i,j} - \mu - r_i - c_j - p_i q_j^T)^2 + \lambda_1 (r_i^2 + c_j^2) + \lambda_2 (\|p_i\|_2^2 + \|q_j\|_2^2)$$

We use the public data set of Ausgrid, but we only use the data from a single substation (the Newton trust-region method [51] is very slow for this example so testing it on all substations takes a prohibitively long time). We limit our option to 30 days and 12 hours measurements i.e the matrix  $D$  is of size  $48 \times 30$  because with a larger matrix size, the Newton trust-region [51] was always reaching the iterations limit.

We compare our method against Newton trust-region algorithm available through the Optim.jl package [51] licensed under <https://github.com/JuliaNLSolvers/Optim.jl/blob/master/LICENSE.md>. In the results/matrix completion subdirectory in the git repository, we include the full results of running our experiments on 10 instances by randomly generating the sampled measurements from the matrix  $D$  with the same values for the regularization parameters as in [49] where we used a value of  $10^{-5}$  for the gradient termination tolerance. This experiment was performed on a MacBook Air (M1, 2020) with 8GB RAM.
